# Supplementary material for: Transcriptome of the Deep-Sea Black Scabbardfish, Aphanopus carbo (Perciformes: Trichiuridae): Tissue-Specific Expression Patterns and Candidate Genes Associated to Depth Adaptation
Source: PubMed Central journal article supplement (PMC4182897; doi:10.1155/2014/267482), 2014-09-17
Supplement: 267482.f1.pdf [file 267482.f1.pdf]

## Supplementary material

1  
2  
3  
4  
5  
6  
7  
8  
9  
10  
11  
12  
13  
14  
15  
16  
17  
18  
19  
20  
21  
22  
23  
24  
25

Fig. S1. Amplification plots of all genes selected for this study in different tissue from *Aphanopus carbo*. The cycle numbers are plotted against the change in fluorescence units expressed in logarithmic scale, and the horizontal line represents the threshold line. S = spleen, B = brain, H = heart, G = gonad, L = liver, M = muscle, \* = expression in the brain was below detection and \*\* = expression in the gonads was below detection.

Tab. S1. Summary table of contig frequency in all tissues for those genes associated to depth not listed in table 3.

Tab. S2. Site-specific selection models for four teleost genes associated to depth. The likelihood ( $\ln L$ ) values and the respective parameters are shown for the two models, M1 (codons under negative or neutral selection) and M2 (which includes codons under positive selection).  $K$  = free parameters;  $\omega$  = ratio of nonsynonymous vs. synonymous substitutions for each class defined in the models and  $p$  = proportion of codon sites belonging to each class of the model tested.

Tab. S3. Values of Gibbs free energy calculations in terms of kinetic and thermodynamic quantities for all depth-related genes. PS = protein stability; GE = Gibbs free energy;  $\Delta G$  = Normalized Gibbs energy change. Taxon coding include the first two letters for the genus followed by three letters for the species name (see Tab. 6).

Tab. S4. List of EST-SSR markers by locus, Genbank accession number, type of motif, sets of primer sequences with relative melting temperatures, expected size of the PCR amplified product and tissues in which the gene targets are expressed (a tissue code within brackets indicates that ESTs were significantly more abundant). Loci were separated by alternating bold and regular

character styles. S = spleen, B = brain, H = heart, G = gonad, L = liver, M = muscle.

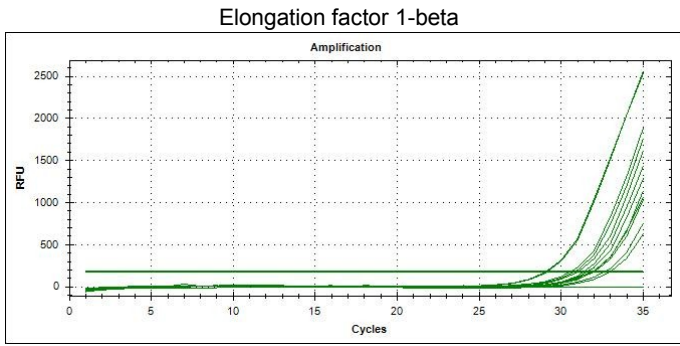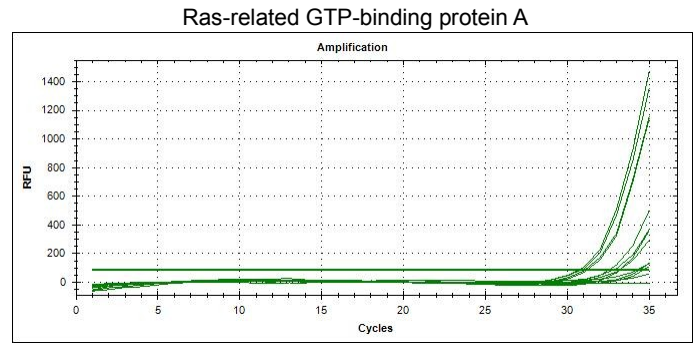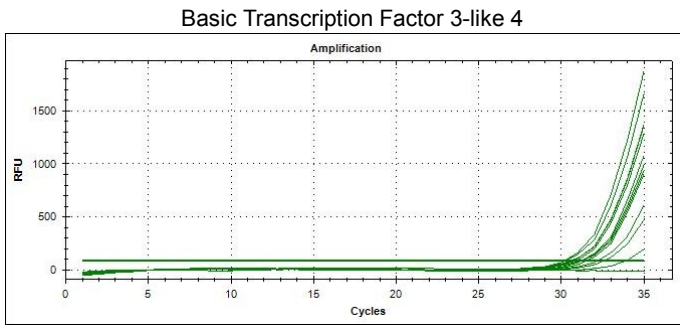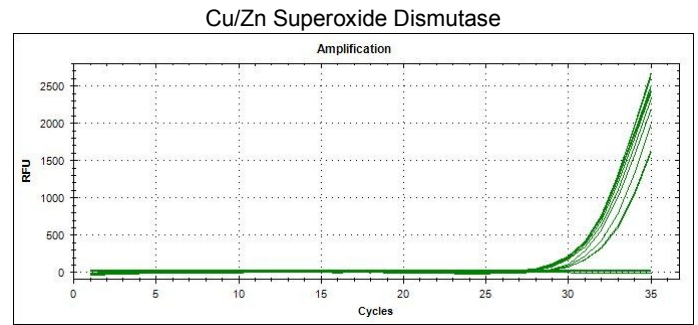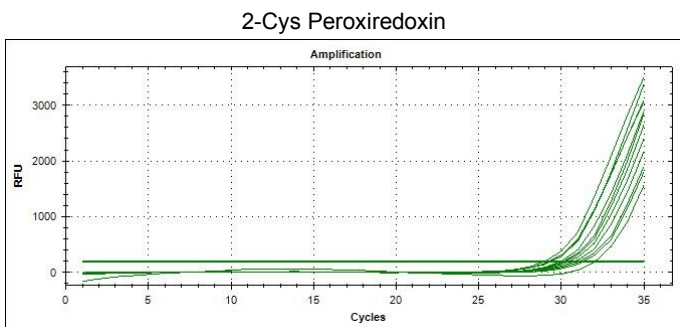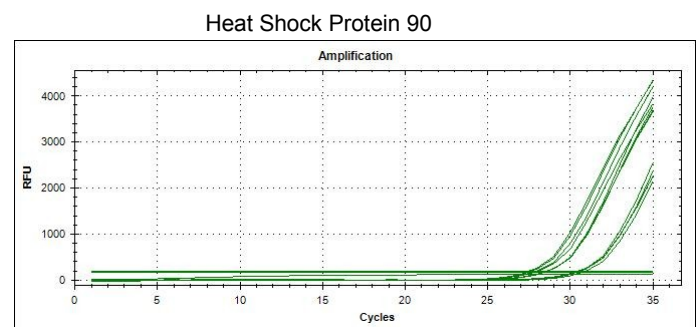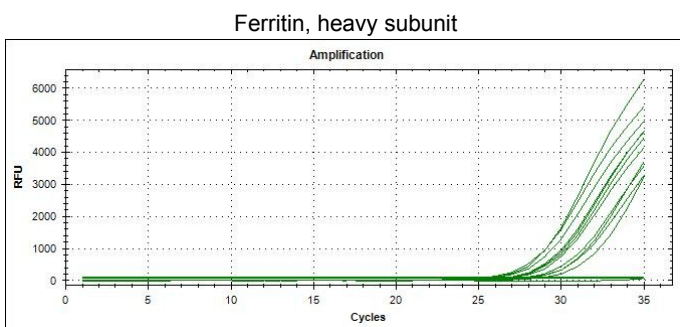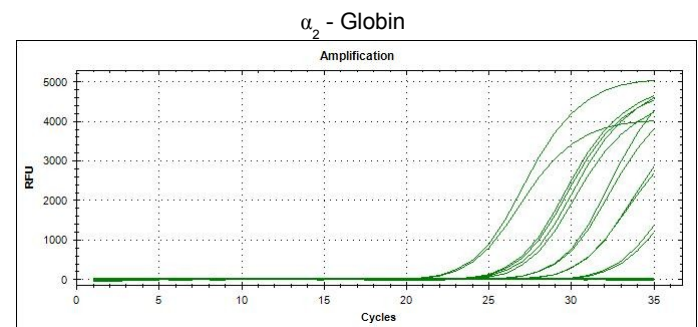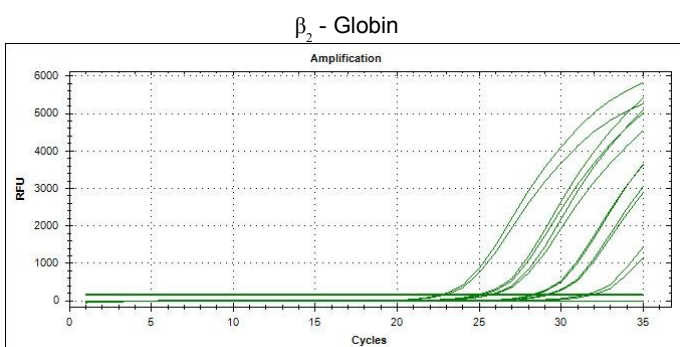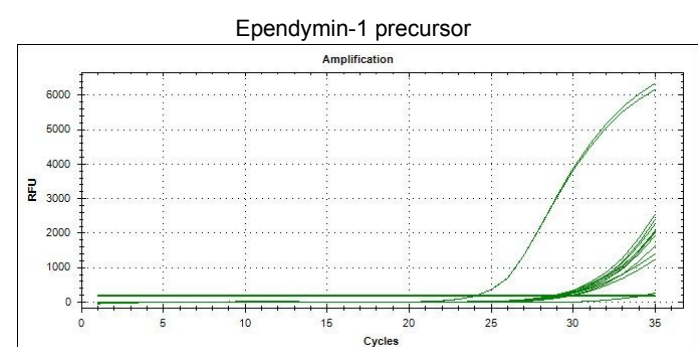

Fig. S1

Fatty acid-binding protein, brain

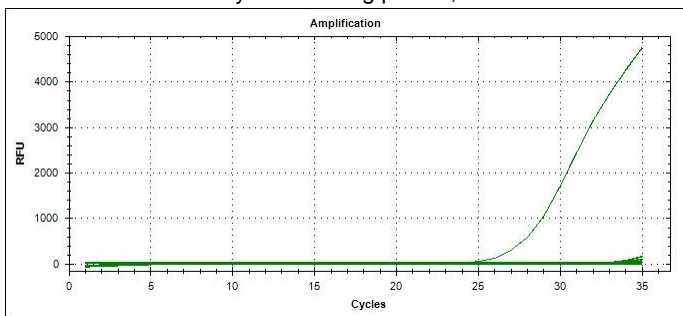

CD63-like protein Sm-TSP-2

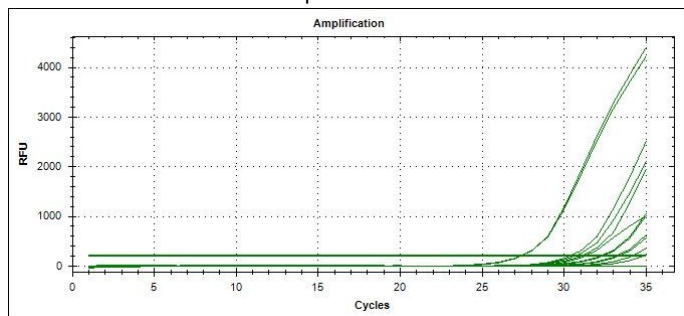

Tropomyosin 4 isoform 1

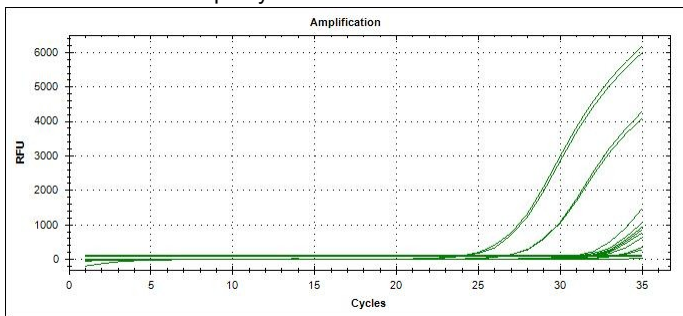

C-Myc-binding protein

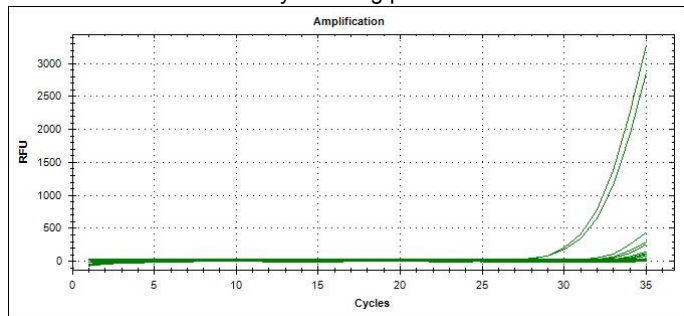

Cathepsin S

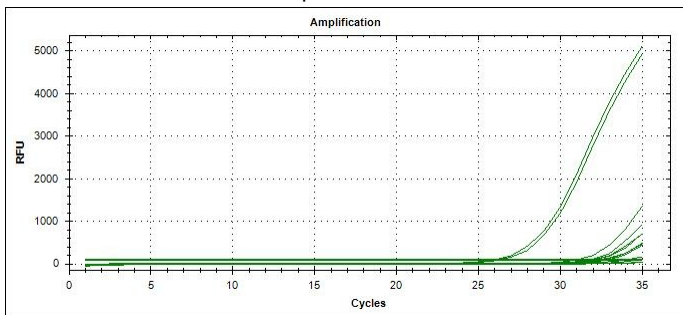

Transferrin

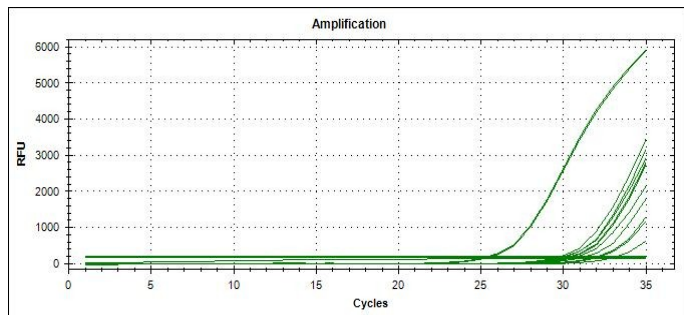

Warm Temperature Acclimation related-like 65kDa protein

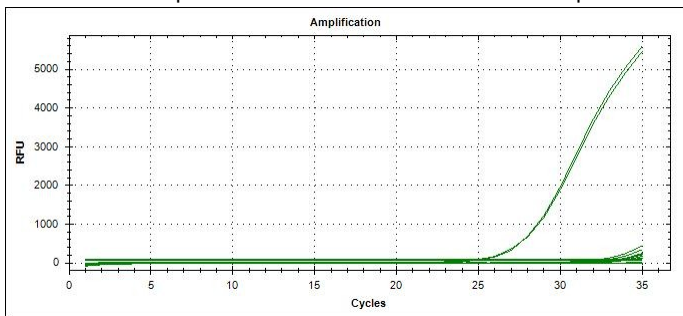

Betaine Homocysteine S-methyltransferase

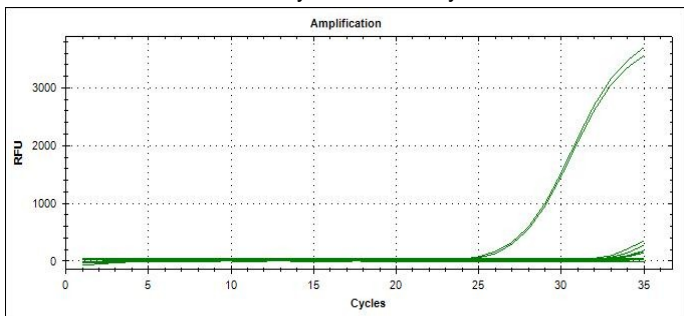

FUCL1 Fucolectin-1

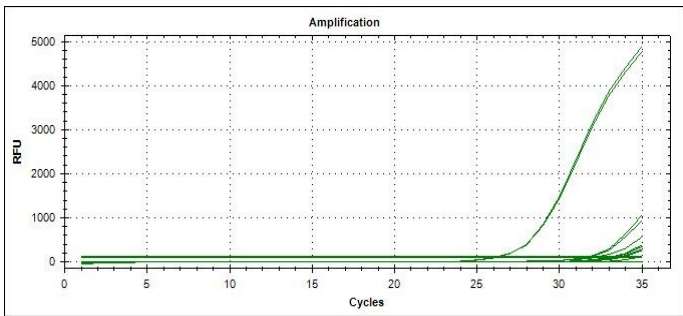

Aldolase B

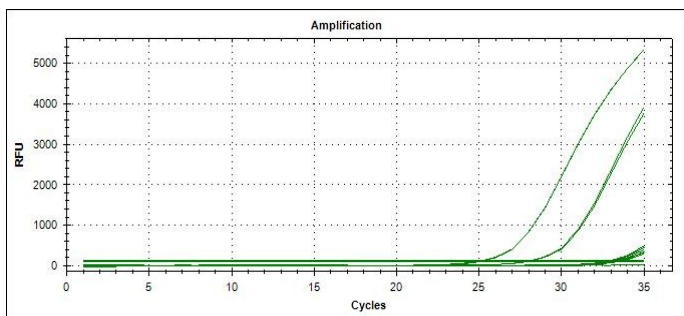

Fig. S1

Type-4 ice-structuring protein LS-12 precursor

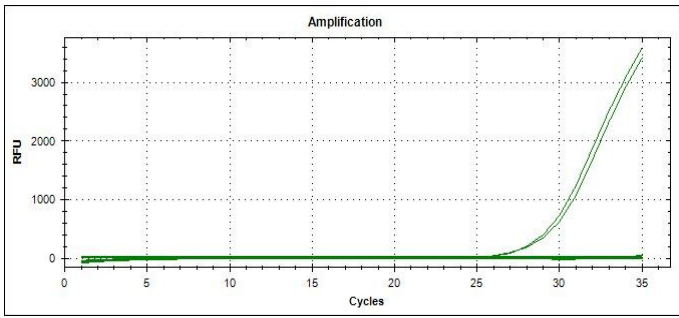

Alcohol Dehydrogenase 8a

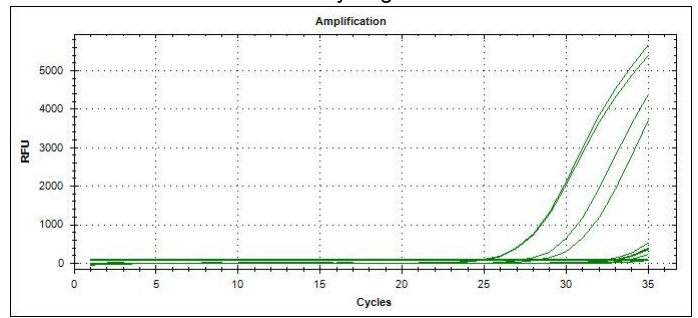

Glyceraldehyde-3-phosphate Dehydrogenase

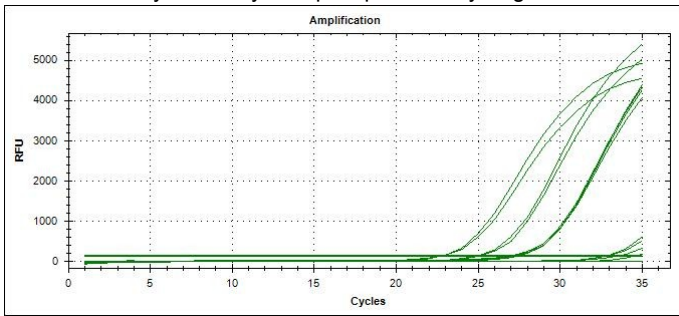

Lactate Dehydrogenase-A

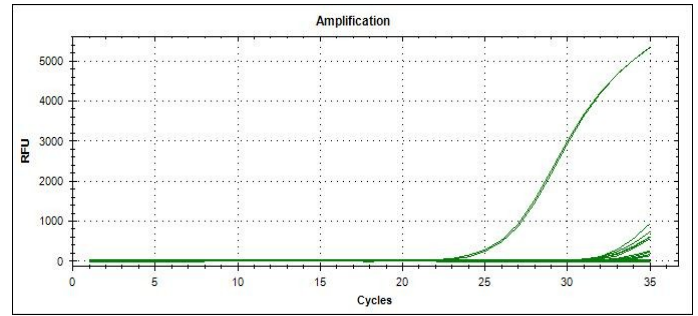

Phosphoglycerate Mutase 2-1 (muscle)

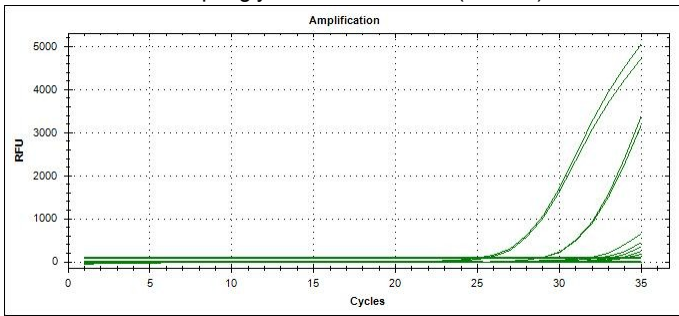

Heat Shock Protein 70

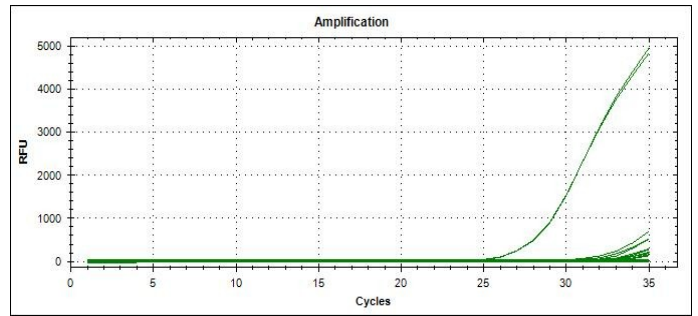

Fructose-bisphosphate Aldolase A

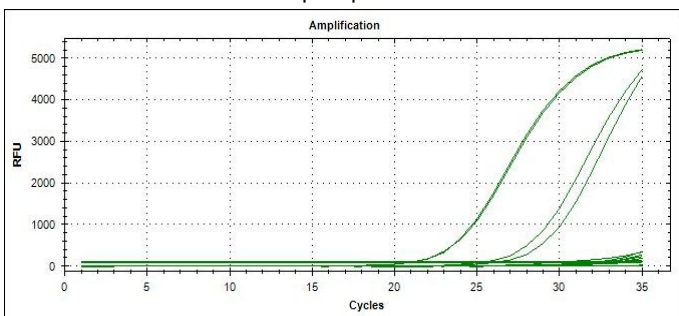

Phosphoglucose Isomerase-2

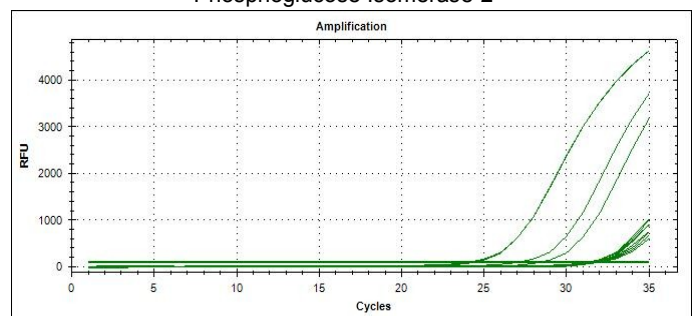

Fig. S1

| <b>Enzyme</b> | <b>Contig code</b> | <b>Brain</b> | <b>Heart</b> | <b>Gonad</b> | <b>Liver</b> | <b>Muscle</b> | <b>Spleen</b> |
|---------------|--------------------|--------------|--------------|--------------|--------------|---------------|---------------|
| LDH-B         | isotig01423        | 3            | 241          | 0            | 1            | 2             | 5             |
| MDHc-A        | isotig01010        | 25           | 86           | 2            | 26           | 0             | 5             |
| MDHc-B*       | isotig01731        | 0            | 3            | 35           | 0            | 10            | 1             |
| Actin 1       | isotig01459        | 1            | 40           | 0            | 0            | 1591          | 1             |
| Actin 2a      | isotig01561        | 0            | 3            | 0            | 0            | 501           | 0             |
| MyHC          | isotig01394**      | 0            | 1            | 0            | 0            | 2199          | 0             |

\*hypothetical

\*\*inclusive of the complementary sequences isotig02568 and isotig01834

Tab S1.

| <b>Gene</b> | <b>Model</b> | <b><math>\omega</math></b> | <b><math>\ln L</math></b> | <b><math>K</math></b> | <b><math>p</math></b> |
|-------------|--------------|----------------------------|---------------------------|-----------------------|-----------------------|
| LDH-A       | M1           | 0.020 / 1.000              | -3090.2583                | 17                    | 0.881 / 0.119         |
|             | M2           | 0.020 / 1.000 / 9.952      | -3090.2583                | 19                    | 0.881 / 0.119 / 0.000 |
| LDH-B       | M1           | 0.032 / 1.000              | -2981.1259                | 15                    | 0.948 / 0.052         |
|             | M2           | 0.032 / 1.000 / 5.558      | -2981.1259                | 17                    | 0.948 / 0.052 / 0.000 |
| MDHc        | M1           | 0.023 / 1.000              | -2636.4461                | 11                    | 0.944 / 0.056         |
|             | M2           | 0.023 / 1.000 / 12.563     | -2636.3758                | 13                    | 0.945 / 0.052 / 0.003 |
| ACTA1       | M1           | 0.001 / 1.000              | -2594.7798                | 17                    | 0.976 / 0.024         |
|             | M2           | 0.006 / 1.000 / 1.000      | -2594.7795                | 19                    | 0.976 / 0.007 / 0.016 |

Tab S2.

| LDH A         | Kinetic calculations |               | Thermodynamic calculations |             | $\Delta G$<br>(cal/mol) |
|---------------|----------------------|---------------|----------------------------|-------------|-------------------------|
|               | PS (Kcal/mol)        | GE (Kcal/mol) | PS (Kcal/mol)              | GE (KJ/mol) |                         |
| <i>Ac_car</i> | 0.3705               | 252.95        | 0.3645                     | -5780.92    | 6.0                     |
| <i>Ch_cau</i> | 0.3614               | 248.20        | 0.3675                     | -5805.17    | -6.1                    |
| <i>Ch_ras</i> | 0.3746               | 254.41        | 0.3595                     | -5655.25    | 15.1                    |
| <i>Rh_nic</i> | 0.3735               | 256.85        | 0.3735                     | -5914.41    | 0                       |
| <i>Cy_car</i> | 0.3825               | 264.37        | 0.3554                     | -5637.11    | 27.1                    |
| <i>Fu_het</i> | 0.3735               | 257.62        | 0.3584                     | -5679.62    | 15.1                    |
| <i>No_cor</i> | 0.3716               | 252.12        | 0.3595                     | -5655.25    | 12.1                    |
| <i>Sp_idi</i> | 0.3765               | 257.86        | 0.3584                     | -5686.14    | 18.1                    |

| LDH B         | Kinetic calculations |               | Thermodynamic calculations |             | $\Delta G$<br>(cal/mol) |
|---------------|----------------------|---------------|----------------------------|-------------|-------------------------|
|               | PS (Kcal/mol)        | GE (Kcal/mol) | PS (Kcal/mol)              | GE (KJ/mol) |                         |
| <i>Ac_car</i> | 0.3563               | 250.74        | 0.3563                     | -5758.11    | 0                       |
| <i>Co_arm</i> | 0.3743               | 261.18        | 0.3383                     | -5495.30    | 36.0                    |
| <i>Fu_het</i> | 0.3713               | 260.54        | 0.3503                     | -5669.52    | 21.0                    |
| <i>Ga_mor</i> | 0.3754               | 261.53        | 0.3363                     | -5415.66    | 39.1                    |
| <i>La_cal</i> | 0.3683               | 259.15        | 0.3383                     | -5481.69    | 30.0                    |
| <i>Me_mer</i> | 0.3754               | 261.53        | 0.3393                     | -5467.26    | 36.1                    |
| <i>Po_ret</i> | 0.3650               | 203.71        | 0.3574                     | -4607.34    | 7.6                     |
| <i>Tr_mur</i> | 0.3743               | 263.18        | 0.3353                     | -5433.19    | 39.0                    |

| MDHc          | Kinetic calculations |               | Thermodynamic calculations |             | $\Delta G$<br>(cal/mol) |
|---------------|----------------------|---------------|----------------------------|-------------|-------------------------|
|               | PS (Kcal/mol)        | GE (Kcal/mol) | PS (Kcal/mol)              | GE (KJ/mol) |                         |
| <i>Ac_car</i> | 0.3904               | 279.66        | 0.3784                     | -6234.9     | 12.0                    |
| <i>Or_lat</i> | 0.3904               | 281.69        | 0.3724                     | -6131.24    | 18.0                    |
| <i>Os_mor</i> | 0.3844               | 276.93        | 0.3784                     | -6200.19    | 6.0                     |
| <i>Sa_sal</i> | 0.3844               | 275.90        | 0.3814                     | -6294.07    | 3.0                     |
| <i>Sp_idi</i> | 0.3994               | 283.63        | 0.3754                     | -6166.56    | 24.0                    |

| Actin 1       | Kinetic calculations |               | Thermodynamic calculations |             | $\Delta G$<br>(cal/mol) |
|---------------|----------------------|---------------|----------------------------|-------------|-------------------------|
|               | PS (Kcal/mol)        | GE (Kcal/mol) | PS (Kcal/mol)              | GE (KJ/mol) |                         |
| <i>Ac_car</i> | 0.3973               | 312.76        | 0.3413                     | -6359.41    | 56.0                    |
| <i>Co_acr</i> | 0.3973               | 312.76        | 0.3413                     | -6359.41    | 56.0                    |
| <i>Co_cin</i> | 0.3973               | 312.76        | 0.3413                     | -6359.41    | 56.0                    |
| <i>Cy_car</i> | 0.3973               | 312.76        | 0.3413                     | -6369.16    | 56.0                    |
| <i>Or_lat</i> | 0.3973               | 312.76        | 0.3413                     | -6359.41    | 56.0                    |
| <i>Pl_azo</i> | 0.3973               | 312.76        | 0.3413                     | -6359.41    | 56.0                    |
| <i>Sc_sco</i> | 0.3973               | 312.76        | 0.3413                     | -6359.41    | 56.0                    |
| <i>Si_chu</i> | 0.3873               | 312.76        | 0.3413                     | -6359.41    | 56.0                    |
| <i>Sp_aur</i> | 0.3893               | 305.17        | 0.3493                     | -6520.33    | 40.0                    |
| <i>Sp_idi</i> | 0.3946               | 310.27        | 0.3387                     | -6309.15    | 55.9                    |

| Actin 2a      | Kinetic calculations |               | Thermodynamic calculations |             | $\Delta G$<br>(cal/mol) |
|---------------|----------------------|---------------|----------------------------|-------------|-------------------------|
|               | PS (Kcal/mol)        | GE (Kcal/mol) | PS (Kcal/mol)              | GE (KJ/mol) |                         |
| <i>Ac_car</i> | 0.3973               | 312.63        | 0.3387                     | -6307.82    | 58.6                    |



|               |        |        |        |          |      |
|---------------|--------|--------|--------|----------|------|
| <i>Co_acr</i> | 0.3973 | 312.76 | 0.3413 | -6349.67 | 56.0 |
| <i>Co_arm</i> | 0.3973 | 312.76 | 0.3413 | -6349.67 | 56.0 |
| <i>Co_cin</i> | 0.3973 | 312.76 | 0.3413 | -6349.67 | 56.0 |
| <i>Co_yaq</i> | 0.3973 | 312.76 | 0.3413 | -6349.67 | 56.0 |

| <b>Actin 2b</b> | <b>Kinetic calculations</b> |                      | <b>Thermodynamic calculations</b> |                    | <b><math>\Delta G</math><br/>(cal/mol)</b> |
|-----------------|-----------------------------|----------------------|-----------------------------------|--------------------|--------------------------------------------|
|                 | <b>PS (Kcal/mol)</b>        | <b>GE (Kcal/mol)</b> | <b>PS (Kcal/mol)</b>              | <b>GE (KJ/mol)</b> |                                            |
| <i>Co_arm</i>   | 0.3973                      | 312.26               | 0.3467                            | -6425.12           | 50.6                                       |
| <i>Co_yaq</i>   | 0.3947                      | 309.97               | 0.3440                            | -6373.53           | 50.7                                       |

| <b>Hb-A</b>   | <b>Kinetic calculations</b> |                      | <b>Thermodynamic calculations</b> |                    | <b><math>\Delta G</math><br/>(cal/mol)</b> |
|---------------|-----------------------------|----------------------|-----------------------------------|--------------------|--------------------------------------------|
|               | <b>PS (Kcal/mol)</b>        | <b>GE (Kcal/mol)</b> | <b>PS (Kcal/mol)</b>              | <b>GE (KJ/mol)</b> |                                            |
| <i>Ac_car</i> | 0.4437                      | 134.93               | 0.4085                            | -2829.51           | 35.2                                       |
| <i>Ar_gla</i> | 0.4507                      | 142.71               | 0.4014                            | -2788.9            | 49.3                                       |
| <i>Bo_sai</i> | 0.4507                      | 142.21               | 0.3944                            | -2729.06           | 56.3                                       |
| <i>Ga_mor</i> | 0.4014                      | 126.31               | 0.4085                            | -2829.51           | -7.1                                       |
| <i>No_ang</i> | 0.3901                      | 123.9                | 0.4043                            | -2794.26           | -14.2                                      |
| <i>Ta_rub</i> | 0.4014                      | 126.8                | 0.3732                            | -2639.74           | 28.2                                       |

| <b>Hb-B</b>   | <b>Kinetic calculations</b> |                      | <b>Thermodynamic calculations</b> |                    | <b><math>\Delta G</math><br/>(cal/mol)</b> |
|---------------|-----------------------------|----------------------|-----------------------------------|--------------------|--------------------------------------------|
|               | <b>PS (Kcal/mol)</b>        | <b>GE (Kcal/mol)</b> | <b>PS (Kcal/mol)</b>              | <b>GE (KJ/mol)</b> |                                            |
| <i>Ac_car</i> | 0.3836                      | 124.0                | 0.3425                            | -2535.55           | 41.1                                       |
| <i>An_fim</i> | 0.3904                      | 121.84               | 0.3493                            | -2523.34           | 41.1                                       |
| <i>Bo_sai</i> | 0.4110                      | 132.06               | 0.3356                            | -2463.14           | 75.4                                       |
| <i>Ga_acu</i> | 0.4041                      | 126.23               | 0.3356                            | -2418.82           | 68.5                                       |
| <i>No_ang</i> | 0.3836                      | 118.93               | 0.3699                            | -2643.42           | 13.7                                       |

Tab. S3

| Locus         | GB acc nr | Repeat motif     | FORWARD PRIMER1 (5'-3')     | Tm(°C)      | REVERSE PRIMER1 (5'-3')      | Tm(°C)      | size (bp)  | Tissue                 |
|---------------|-----------|------------------|-----------------------------|-------------|------------------------------|-------------|------------|------------------------|
| Ac1400        |           | (GATG)5          | GACTATGTCTCTCGGCTGGC        | 60.0        | CAGAATGACTGCATCAGGGA         | 59.8        | 186        | B/G/L/M/S              |
|               |           |                  | AGGAAGAGCTGGACGAAGTG        | 59.6        | CAGAATGACTGCATCAGGGA         | 59.8        | 143        |                        |
| <b>Ac1461</b> |           | <b>(ACA)9</b>    | <b>TTGTTGCTCATGTTTCGTCC</b> | <b>59.7</b> | <b>GAGGAGACCATCAAGAAGCG</b>  | <b>60.0</b> | <b>252</b> | <b>B/G/H(M)</b>        |
|               |           |                  | <b>TTGTTGCTCATGTTTCGTCC</b> | <b>59.7</b> | <b>CATCGTCAGGAAGGTGGACT</b>  | <b>60.1</b> | <b>175</b> |                        |
| Ac1465        |           | (CA)13           | GTTGGTCCGAGTTGGAGTTC        | 59.6        | CTCCAAACACCAGGGACTGT         | 60.0        | 171        | (G)/H/M                |
|               |           |                  | GTTGGTCCGAGTTGGAGTTC        | 59.6        | GTCCCTGGACTCTGGAACAA         | 60.1        | 197        |                        |
|               |           |                  | GTTGGTCCGAGTTGGAGTTC        | 59.6        | CTTCTAAACACGACGCCTCC         | 59.9        | 257        |                        |
| <b>Ac0512</b> |           | <b>(ATCA)22</b>  | <b>TTACTCAGCAACATGCCAGC</b> | <b>60.0</b> | <b>GAGCTTCTATCCTCAGGCCA</b>  | <b>59.5</b> | <b>265</b> | <b>B/G/H(L)/S</b>      |
|               |           |                  | <b>GCAGCCTCTGTTACTCAGCA</b> | <b>59.3</b> | <b>GAGCTTCTATCCTCAGGCCA</b>  | <b>59.5</b> | <b>275</b> |                        |
|               |           |                  | <b>TTACTCAGCAACATGCCAGC</b> | <b>60.0</b> | <b>TCCTGAATGAGGTCACTGCTT</b> | <b>59.9</b> | <b>239</b> |                        |
| Ac0513        |           | (ATCA)5t(TCAA)12 | TTACTCAGCAACATGCCAGC        | 60.0        | GCACAGAGAGGCTCAGGAAG         | 60.3        | 264        | B/G/H(L)/S             |
|               |           |                  | TTACTCAGCAACATGCCAGC        | 60.0        | GAGCTTCTATCCTCAGGCCA         | 59.5        | 245        |                        |
| <b>Ac0848</b> |           | <b>(TG)12</b>    | <b>GGAGCCAACCTGTTGAGTGT</b> | <b>60.2</b> | <b>ACACGTTGTGTTTAGCAGCG</b>  | <b>60.0</b> | <b>154</b> | <b>B/(G)/(H)/L/M/S</b> |
|               |           |                  | <b>AGTAGTGAAGGGTGTGGCG</b>  | <b>60.2</b> | <b>ACACGTTGTGTTTAGCAGCG</b>  | <b>60.0</b> | <b>131</b> |                        |
|               |           |                  | <b>GGAGCCAACCTGTTGAGTGT</b> | <b>60.2</b> | <b>GGAACCTTCTCAGGCAAG</b>    | <b>59.8</b> | <b>124</b> |                        |
| Ac1648        |           | (CAA)8           | GAAAGCATGGTGGCTCCTAA        | 60.2        | TGTGGTCTTGCGATGAAGAG         | 60.0        | 168        | B/H/L/M                |
|               |           |                  | GCGCCGAGGACACTTTATTA        | 60.2        | TGTGGTCTTGCGATGAAGAG         | 60.0        | 245        |                        |
|               |           |                  | TAAAAGAAGTCCGCGGTCAC        | 60.2        | TGTGGTCTTGCGATGAAGAG         | 60.0        | 208        |                        |
| <b>Ac1657</b> |           | <b>(TCAA)5</b>   | <b>TGATGTCCCTTGTGTGCAT</b>  | <b>60.0</b> | <b>AGGCTGACAAACCGTCTGAT</b>  | <b>59.7</b> | <b>256</b> | <b>B/G/H/L/M/S</b>     |
|               |           |                  | <b>GGATTCTGTGATGCCTGTT</b>  | <b>60.1</b> | <b>AGGCTGACAAACCGTCTGAT</b>  | <b>59.7</b> | <b>173</b> |                        |
|               |           |                  | <b>GCGCTGTTATTGATGTCCCT</b> | <b>60.1</b> | <b>AGGCTGACAAACCGTCTGAT</b>  | <b>59.7</b> | <b>266</b> |                        |
| Ac1684        |           | (TTG)9           | TGTTTAATGCAGTGAGCGGA        | 60.4        | GTCCAACGTTTGGTCTGTTTT        | 59.9        | 167        | B/G/H/L/M/S            |
|               |           |                  | TGTTTAATGCAGTGAGCGGA        | 60.4        | AAATGTGTGCATGCAGGAAG         | 59.7        | 189        |                        |
|               |           |                  | AGCAGCTGGAGGACGTTACA        | 61.0        | GTCCAACGTTTGGTCTGTTTT        | 59.9        | 262        |                        |
| <b>Ac1692</b> |           | <b>(CTC)8</b>    | <b>CCTCCTCCATCATCTCCTGA</b> | <b>60.2</b> | <b>AGGAGGAATCAGCCAAGGTT</b>  | <b>60.1</b> | <b>123</b> | <b>B</b>               |
|               |           |                  | <b>TCCTCCTCCATCATCTCCTG</b> | <b>60.2</b> | <b>AGGAGGAATCAGCCAAGGTT</b>  | <b>60.1</b> | <b>124</b> |                        |
|               |           |                  | <b>CCTCCTCCATCATCTCCTGA</b> | <b>60.2</b> | <b>TTCCTCCTCCTCCTCCTC</b>    | <b>59.9</b> | <b>239</b> |                        |
| Ac0944        |           | (GAG)8           | CAGCTGTAACTCCAGCTCCC        | 60.0        | TCTTCATCACTGCCGAACAG         | 60.0        | 151        | B/G/H/L/M/S            |
|               |           |                  | CAGCTGTAACTCCAGCTCCC        | 60.0        | GCGTACGCTTTCAACCTCTC         | 60.0        | 196        |                        |
|               |           |                  | CAGCTGTAACTCCAGCTCCC        | 60.0        | GCCGAACAGGTCAATATCGT         | 60.0        | 140        |                        |
| <b>Ac1700</b> |           | <b>(AGC)10</b>   | <b>AGCAACAAGCACTCCCTCAT</b> | <b>59.9</b> | <b>TGCTCGTACATGTCCCTCTG</b>  | <b>59.9</b> | <b>236</b> | <b>B/G/H/L/M</b>       |
|               |           |                  | <b>AGCAACAAGCACTCCCTCAT</b> | <b>59.9</b> | <b>CCCCACTCCATGTCAATTCTT</b> | <b>59.8</b> | <b>278</b> |                        |
| Ac1735        |           | (GT)13           | TTCTTCCCACCGATAACCTG        | 59.9        | CACACACAAAAGTTGGACCG         | 60.0        | 200        | B/G/L/M/S              |
|               |           |                  | CCCGGAGTCTGGATGAATTA        | 59.9        | GTTTATTTTTGGCGGAGCAA         | 60.1        | 271        |                        |
|               |           |                  | TTCTTCCCACCGATAACCTG        | 59.9        | TTTATTTTTGGCGGAGCAA          | 60.2        | 150        |                        |
| <b>Ac0945</b> |           | <b>(GAG)8</b>    | <b>CAGCTGTAACTCCAGCTCCC</b> | <b>60.0</b> | <b>TCTTCATCACTGCCGAACAG</b>  | <b>60.0</b> | <b>151</b> | <b>B/G/H/L/M/S</b>     |
|               |           |                  | <b>CAGCTGTAACTCCAGCTCCC</b> | <b>60.0</b> | <b>GCGTACGCTTTCAACCTCTC</b>  | <b>60.0</b> | <b>196</b> |                        |

| Locus  | GB acc nr | Repeat motif | FORWARD PRIMER1 (5'-3')                                                                   | Tm(°C)                                    | REVERSE PRIMER1 (5'-3')                                                                 | Tm(°C)                                    | size (bp)                              | Tissue             |
|--------|-----------|--------------|-------------------------------------------------------------------------------------------|-------------------------------------------|-----------------------------------------------------------------------------------------|-------------------------------------------|----------------------------------------|--------------------|
| Ac1773 |           | (CA)14       | TTCGGTGGTGGGTTTACC<br>AAAGCACCAAAGTGCTCTTCA<br>TCTCCAATGATGGTGAACACA                      | 59.7<br>60.0<br>60.0                      | CATGTCACGTTTATTGCC<br>TTGCCCAACTCTAGGAGTGC<br>TTGCCCAACTCTAGGAGTGC                      | 58.9<br>60.4<br>60.4                      | 100<br>177<br>255                      | B/G/H/L/M/S        |
| Ac1817 |           | (GT)20       | <b>CTTGACACACAAACACACTCA</b><br><b>GCTCAGGTATTTTCAGTGCAGTC</b>                            | <b>59.7</b><br><b>60.3</b>                | <b>AACTGGCAGGACAAGCTGTT</b><br><b>GAGATCGCGACCTACAGGAG</b>                              | <b>59.9</b><br><b>60.0</b>                | <b>208</b><br><b>224</b>               | <b>B/G/L/M/S</b>   |
| Ac1860 |           | (AATC)10     | GACCCAAACTGAAGCAGCTC<br>AAAACACAAAGGATGCTGGG                                              | 60.0<br>60.0                              | ACAATCGGCTCGTGTCAATT<br>ACAATCGGCTCGTGTCAATT                                            | 60.5<br>60.5                              | 186<br>211                             | B/G/H/L/M/S        |
| Ac1860 |           | (AC)17       | <b>CGGCTGGAAAATCAATCAAT</b><br><b>AATCAATCAATCAATCCGGC</b><br><b>CGGCTGGAAAATCAATCAAT</b> | <b>59.9</b><br><b>59.7</b><br><b>59.9</b> | <b>CGTCTACAAACCACCGACT</b><br><b>CGTCTACAAACCACCGACT</b><br><b>TTTGCATGTTCTGTTCGTCC</b> | <b>60.0</b><br><b>60.0</b><br><b>59.7</b> | <b>255</b><br><b>222</b><br><b>270</b> | <b>B/G/H/L/M/S</b> |
| Ac2043 |           | (TGTA)10     | GGAGAGGCTGTCAGACTTCAA                                                                     | 59.6                                      | CCCGAATATGAAGCCAAAAC                                                                    | 59.4                                      | 272                                    | (H)/L              |
| Ac2060 |           | (TCA)8       | <b>CAGCGTGAGGATGATGAAAA</b><br><b>CAGCGTGAGGATGATGAAAA</b>                                | <b>59.8</b><br><b>59.8</b>                | <b>ATGACGACGACGATGATGAC</b><br><b>GACGATGATGACGACGATGA</b>                              | <b>59.5</b><br><b>60.7</b>                | <b>272</b><br><b>243</b>               | <b>M</b>           |
| Ac2117 |           | (ATT)11      | AGGAGAGTGAAGTTTCCGCA                                                                      | 60.0                                      | CAATTAGGCCATCTCACCAC                                                                    | 58.0                                      | 237                                    | B/G/H/L/M          |
| Ac2124 |           | (AC)13       | <b>ACACACACACGCACACACAC</b>                                                               | <b>60.2</b>                               | <b>GAGCCTGCTAGGAAAGAGCC</b>                                                             | <b>60.6</b>                               | <b>101</b>                             | <b>B/G/L/M/S</b>   |
| Ac2130 |           | (TG)17       | GAGGCCTACCCCCAGTAAAG                                                                      | 60.0                                      | AGTCATATCTGGTCACAACACCA                                                                 | 59.4                                      | 233                                    | B/G/H/L/M/S        |
| Ac0582 |           | (GT)20       | <b>TCTACAGTCAATCCCCACCC</b><br><b>TCTACAGTCAATCCCCACCC</b>                                | <b>59.8</b><br><b>59.8</b>                | <b>AGGTACGAGACGCTCCTGAA</b><br><b>GGATGAGGCCAAAGCTACAG</b>                              | <b>60.0</b><br><b>59.8</b>                | <b>217</b><br><b>275</b>               | <b>B/G/H/L/M/S</b> |
| Ac0617 |           | (AAAT)5      | CAAGCAAGACCAGTGCAAAA<br>AGCATTAGGGCTGTCAATCG                                              | 60.0<br>60.2                              | CGGTACCAACCATGTGATGA<br>CGGTACCAACCATGTGATGA                                            | 60.2<br>60.2                              | 232<br>113                             | H                  |
| Ac2218 |           | (ATCT)6      | <b>GAGCCCTGTGCTACTTTTGC</b><br><b>TTTCTGTTTGCTTCATCCC</b>                                 | <b>60.0</b><br><b>60.1</b>                | <b>GAGCTCCAGTGATGGGAGAG</b><br><b>GAGCTCCAGTGATGGGAGAG</b>                              | <b>59.9</b><br><b>59.9</b>                | <b>275</b><br><b>227</b>               | <b>B/G/H/M/S</b>   |
| Ac0618 |           | (AAAT)5      | CAAGCAAGACCAGTGCAAAA<br>AGCATTAGGGCTGTCAATCG                                              | 60.0<br>60.2                              | CGGTACCAACCATGTGATGA<br>CGGTACCAACCATGTGATGA                                            | 60.2<br>60.2                              | 232<br>113                             | H                  |
| Ac2335 |           | (TGT)9       | <b>TTGACAGCTCGTTCCTCTGA</b>                                                               | <b>59.7</b>                               | <b>CCTCAAAAACAAGAAAGCCGA</b>                                                            | <b>60.4</b>                               | <b>145</b>                             | <b>G/H/M/S</b>     |
| Ac1036 |           | (TGA)8       | CAAGCCTCGAAGACGTAAGG<br>CTGATGGTCATCCTGGTCTT<br>CAAGCCTCGAAGACGTAAGG                      | 60.0<br>59.9<br>60.0                      | AGTTTCTGCTTTGGCACAGG<br>AGTTTCTGCTTTGGCACAGG<br>GGGTAGCAAAGAGCTCGTCA                    | 60.4<br>60.4<br>60.5                      | 162<br>218<br>268                      | H/L                |
| Ac2385 |           | (ATG)11      | <b>GACATGATGCAGAGGCAGTG</b><br><b>GACATGATGCAGAGGCAGTG</b>                                | <b>60.4</b><br><b>60.4</b>                | <b>CCTCTGACCCTTCCTAACCC</b><br><b>TGTCCAATGAGCAACCAGAG</b>                              | <b>59.9</b><br><b>59.8</b>                | <b>174</b><br><b>236</b>               | <b>B/M</b>         |
| Ac2551 |           | (TG)12       | CAAAGATGGCAAAGAGCACA<br>CAAGAAGCACAAAGTCCGACA<br>CCGACAGTAACGACGAGTCA                     | 60.0<br>60.0<br>59.9                      | TGCAAGGACAAGAAGGAAGG<br>TGCAAGGACAAGAAGGAAGG<br>TGCAAGGACAAGAAGGAAGG                    | 60.4<br>60.4<br>60.4                      | 233<br>272<br>258                      | B/H/L/S            |
| Ac2617 |           | (GCA)8       | <b>AGCCGCTGTAAGTCAAGGT</b><br><b>CTGGCTGGAGGTGAAGTGTT</b>                                 | <b>59.9</b><br><b>60.3</b>                | <b>TAAAAGGTGCTGGGCAGAT</b><br><b>TAAAAGGTGCTGGGCAGAT</b>                                | <b>59.7</b><br><b>59.7</b>                | <b>151</b><br><b>125</b>               | <b>B</b>           |
| Ac0432 |           | (AAT)9       | TTACAGGCTGGTGACAGGTG<br>GGTTTGCTGCAGTTGGTCTT<br>TTACAGGCTGGTGACAGGTG                      | 59.7<br>60.3<br>59.7                      | GGACTACAGTGAGAAGCCGC<br>GGACTACAGTGAGAAGCCGC<br>ATGAGGGACGGACTGACAAG                    | 60.0<br>60.0<br>60.1                      | 233<br>214<br>252                      | L                  |
| Ac2769 |           | (ATG)13      | <b>TAGAATTTGGTGGTGCTCCC</b>                                                               | <b>59.9</b>                               | <b>TGAATCATTCCCCTGCATCT</b>                                                             | <b>60.4</b>                               | <b>149</b>                             | <b>L</b>           |

| Locus  | GB acc nr | Repeat motif | FORWARD PRIMER1 (5'-3') | Tm(°C) | REVERSE PRIMER1 (5'-3') | Tm(°C) | size (bp) | Tissue      |
|--------|-----------|--------------|-------------------------|--------|-------------------------|--------|-----------|-------------|
| Ac2832 |           | (TG)12       | TCTGTGCTTCAGTGTGTCAGC   | 60.2   | TCAGGCACCAACAGTTTTCA    | 60.3   | 272       | (L)/H       |
| Ac2911 |           | (GCT)9       | TCAGTTCCTTCGTCAGGGAT    | 59.7   | CTTCTGGATGAGGAGAACGC    | 60.0   | 221       | B/G/H/L/M   |
| Ac1037 |           | (TGA)8       | CAAGCCTCGAAGACGTAAGG    | 60.0   | AGTTTCTGCTTTGGCACAGG    | 60.4   | 162       | H/L         |
|        |           |              | CTGATGGTCATCCTGGTCTT    | 59.9   | AGTTTCTGCTTTGGCACAGG    | 60.4   | 218       |             |
|        |           |              | CAAGCCTCGAAGACGTAAGG    | 60.0   | GGGTAGCAAAGAGCTCGTCA    | 60.5   | 242       |             |
| Ac3081 |           | (AAAT)5      | TATGGAGGACTGGAAGTCC     | 60.1   | GCATGTGGTCACTACAAAGCA   | 59.8   | 262       | G/L         |
| Ac0516 |           | (GT)61       | AACCTGCAGAAAAGCCAAAGA   | 60.0   | CAACCACAACACTGCTGCTT    | 59.9   | 219       | B/G/H/L/M/S |
|        |           |              | GTCGAACACAACCTGCAGAA    | 59.9   | CAACCACAACACTGCTGCTT    | 59.9   | 228       |             |
| Ac0517 |           | (GT)79       | CATTTTCCATCTGGACTGGC    | 60.5   | CAACCACAACACTGCTGCTT    | 59.9   | 258       | B/G/H/L/M/S |
| Ac3230 |           | (TG)14       | TGACGTGATGCTGGATGAAT    | 60.1   | GGGGATTGTGGAGCATAAAT    | 58.7   | 263       | H/L         |
| Ac3316 |           | (TAT)10      | GCTTCAGAAAAGACCTGCGT    | 59.6   | GGCATGATCCCTTAACCTGA    | 59.9   | 222       | G/L         |
|        |           |              | GCTTCAGAAAAGACCTGCGT    | 59.6   | AATACGTGAAGCAAGGGACG    | 60.1   | 141       |             |
| Ac3266 |           | (ATG)10      | GTATTGATCCTCGTCTCCG     | 59.5   | AGATAACCAATGCAGGCAGC    | 60.2   | 194       | B/G/H/M/S   |
|        |           |              | TATCCCGTTAACGACACGCT    | 60.5   | AGATAACCAATGCAGGCAGC    | 60.2   | 260       |             |
| Ac3328 |           | (CA)14       | TGAAGACCAAACGCTGTTAGC   | 60.4   | TTTGTGTGTGCATGTGTGTG    | 60.1   | 182       | B/G/M/S     |
| Ac3511 |           | (AGAC)5      | TATGCTGTGCAGGAGGACAC    | 59.9   | GTGCCTGGATGTCGAAGTTT    | 60.1   | 102       | G/L/M       |
|        |           |              | TATGCTGTGCAGGAGGACAC    | 59.9   | GAGAAGACCCACTGCAGGAC    | 59.8   | 236       |             |
|        |           |              | TATGCTGTGCAGGAGGACAC    | 59.9   | AAGGCCAGGAAGGAGAAGAC    | 59.8   | 248       |             |
| Ac3540 |           | (CA)15       | ACTTGATTTTCTGCACCGT     | 59.6   | TTACTCCACCAACCTGAGCG    | 61.2   | 100       | L           |
| Ac0714 |           | (ACA)8       | CTCAGGGGGCTTTACAGTCT    | 58.4   | CGTTACTGTGGGGGATTGAC    | 60.2   | 279       | B/G/L/M/S   |
| Ac3684 |           | (GAAAT)5     | AGCAGTCTACACAAAGCTGGC   | 59.7   | GAGCGAACAGAAGAACGACC    | 60.0   | 163       | M           |
|        |           |              | AGCAGTCTACACAAAGCTGGC   | 59.7   | CCATCACACGAAACAACGAC    | 60.0   | 220       |             |
| Ac3766 |           | (TGT)9       | GTTTCTGTGCTCGAAGGACC    | 59.9   | AAGTTTCTCACATGCCAGC     | 60.3   | 135       | G/H/M       |
|        |           |              | TATTTCTTGAAGGGAGGGGG    | 60.3   | AAGTTTCTCACATGCCAGC     | 60.3   | 251       |             |
|        |           |              | ACCAGCTGGATGAAGTCTTG    | 60.3   | AAGTTTCTCACATGCCAGC     | 60.3   | 200       |             |
| Ac0583 |           | (GT)15       | TCTACAGTCAATCCCCACCC    | 59.8   | ATCAGGTTTCTTCCCTCCGT    | 59.9   | 231       | B/G/H/L/M/S |
|        |           |              | TCTACAGTCAATCCCCACCC    | 59.8   | AAGAACTTCTGCAAGCCTGG    | 59.6   | 170       |             |
|        |           |              | TCTACAGTCAATCCCCACCC    | 59.8   | AGCCTGGCTTTGTTTAGCCT    | 60.4   | 157       |             |
| Ac0862 |           | (CGAT)6      | CAGCTGTTCAAGCAGTGAAGC   | 59.9   | ACAGCTGCTCAAACGTCCTT    | 60.1   | 150       | B/G/H/L/M/S |
|        |           |              | GTGTCCGTCAACTCGTTCCT    | 60.2   | ACAGCTGCTCAAACGTCCTT    | 60.1   | 214       |             |
| Ac3924 |           | (TTGT)5      | CGTCATTGTATAAACACGCA    | 59.5   | TGGTTATTTCCGCCTTCTG     | 60.1   | 250       | G/L         |
| Ac3974 |           | (TTTG)7      | TCGAAGTCTGGATTTGACCC    | 60.1   | TCGTTTCCACTCTGAACTGTTG  | 60.3   | 159       | H           |
|        |           |              | ACATGGAGGACGGAGACATC    | 59.9   | TCGTTTCCACTCTGAACTGTTG  | 60.3   | 180       |             |
| Ac3982 |           | (GT)13       | ACCACAGAAATGAACACGCA    | 60.2   | TGAACATGGAGCTGAAGTGC    | 60.0   | 242       | G/H/L/M     |
|        |           |              | ACCACAGAAATGAACACGCA    | 60.2   | GATAAAGAGGCAAAAGCCCC    | 60.0   | 265       |             |
|        |           |              | ACCACAGAAATGAACACGCA    | 60.2   | ACACACTTAATGCAGCACGC    | 59.9   | 182       |             |
| Ac4090 |           | (AAAC)5      | CTTCGTCTCTCAGCCTGGTC    | 60.1   | AAGGCGATTCAAAGTGTGT     | 59.9   | 164       | L           |
| Ac4068 |           | (AC)12       | TGTCCCTGGACATACTTACA    | 59.0   | CCAAACGTTGTCATGCTCTG    | 60.3   | 202       | G/H/L       |

| Locus         | GB acc nr | Repeat motif                | FORWARD PRIMER1 (5'-3')                                                                   | Tm(°C)                                    | REVERSE PRIMER1 (5'-3')                                                                   | Tm(°C)                                    | size (bp)                              | Tissue             |
|---------------|-----------|-----------------------------|-------------------------------------------------------------------------------------------|-------------------------------------------|-------------------------------------------------------------------------------------------|-------------------------------------------|----------------------------------------|--------------------|
| Ac4114        |           | (TGA)8                      | TTCGGGGAAC TTTGATACG<br>ATTCATCCC ACTGAAGGGGT                                             | 59.9<br>60.6                              | ATTCGAGCATGGTCATTCC<br>ATTCGAGCATGGTCATTCC                                                | 59.9<br>59.9                              | 192<br>121                             | B/G/L/S            |
| <b>Ac4134</b> |           | <b>(ATT)10</b>              | <b>CGTTCCTTTACCTCTCAA</b><br><b>CGTTCCTTTACCTCTCAA</b>                                    | <b>60.2</b><br><b>60.2</b>                | <b>CCCTGCTGTAAGCAAACAA</b><br><b>TGAATAATTCCAACCCTGCTG</b>                                | <b>59.0</b><br><b>59.9</b>                | <b>243</b><br><b>256</b>               | <b>G/H/M/S</b>     |
| <b>Ac4132</b> |           | <b>(TTG)8</b>               | <b>CTGCTTCCAGTTGCTTCACA</b>                                                               | <b>60.2</b>                               | <b>AAATGAGAGACAAACACGACCA</b>                                                             | <b>59.6</b>                               | <b>184</b>                             | <b>G/M</b>         |
| Ac4288        |           | (ATT)11                     | TTCATAGGAATGAACGGGG<br>TTCATAGGAATGAACGGGG                                                | 59.9<br>59.9                              | TTTATACGAGTTGCCCCAGG<br>GTGCAGCCATTACAAAGCAA                                              | 60.0<br>59.9                              | 252<br>222                             | G/L/M/S            |
| <b>Ac0519</b> |           | <b>(GT)54</b>               | <b>AACCTGCAGAAAGCCAAAGA</b>                                                               | <b>60.0</b>                               | <b>CAGCCTCTCTCTCTCCGA</b>                                                                 | <b>60.0</b>                               | <b>240</b>                             | <b>B/G/H/L/M/S</b> |
| Ac4246        |           | (CA)12acacacgcacgcacg(CA)15 | GAGCAGCAGGATCAAGGTTC                                                                      | 60.0                                      | TGTGTGTGTGTCGTGTGTGTC                                                                     | 60.2                                      | 280                                    | G/(L)/S            |
| <b>Ac1194</b> |           | <b>(GAT)8</b>               | <b>CGTCTCTTTACAGCGTTTC</b>                                                                | <b>58.7</b>                               | <b>TGTGCAGCCCTTTAATCTGA</b>                                                               | <b>59.4</b>                               | <b>215</b>                             | <b>H/L</b>         |
| Ac0518        |           | (GT)72                      | CATTTTCCATCTGGACTGGC<br>CATTTTCCATCTGGACTGGC                                              | 60.5<br>60.5                              | CAGCCTCTCTCTCTCCGA<br>ACTGAGAGAGAGCCACGGTC                                                | 60.0<br>59.6                              | 279<br>226                             | B/G/H/L/M/S        |
| <b>Ac0520</b> |           | <b>(GT)53</b>               | <b>AACCTGCAGAAAGCCAAAGA</b><br><b>AACCTGCAGAAAGCCAAAGA</b>                                | <b>60.0</b><br><b>60.0</b>                | <b>TTGGAAAACTCATCCAGCC</b><br><b>ATCCAGCCTATTCAGGCAGA</b>                                 | <b>60.1</b><br><b>59.8</b>                | <b>241</b><br><b>229</b>               | <b>B/G/H/L/M/S</b> |
| Ac0521        |           | (GT)71                      | CATTTTCCATCTGGACTGGC<br>CATTTTCCATCTGGACTGGC                                              | 60.5<br>60.5                              | TTGGAAAACTCATCCAGCC<br>ATCCAGCCTATTCAGGCAGA                                               | 60.1<br>59.8                              | 280<br>268                             | B/G/H/L/M/S        |
| <b>Ac4975</b> |           | <b>(GAAT)5</b>              | <b>GCCAATGTGCTGCCTAAACT</b><br><b>GTGCAACTTATTGCTGCCCT</b>                                | <b>60.3</b><br><b>60.3</b>                | <b>TTTCGAGAATGACCATGCAA</b><br><b>TTTCGAGAATGACCATGCAA</b>                                | <b>60.2</b><br><b>60.2</b>                | <b>198</b><br><b>250</b>               | <b>G/H</b>         |
| Ac5056        |           | (ATGT)6                     | TTCATGACAAGGTCGCAAAT<br>TTCATGACAAGGTCGCAAAT                                              | 59.1<br>59.1                              | ACAGCCCAACTTAGCTCTGC<br>TCTGCTTTGCTGTGACCACT                                              | 59.6<br>59.6                              | 251<br>236                             | B/H/M              |
| <b>Ac5167</b> |           | <b>(AC)18</b>               | <b>ATCGATGACTGTCCCTCGTC</b><br><b>GCAGTTCTACAACTCGCCC</b><br><b>TTTCATCAGCAGACGGACAC</b>  | <b>60.1</b><br><b>59.9</b><br><b>59.8</b> | <b>TTTTCCATCCAGTCACCCAT</b><br><b>TTTTCCATCCAGTCACCCAT</b><br><b>TTTTCCATCCAGTCACCCAT</b> | <b>60.2</b><br><b>60.2</b><br><b>60.2</b> | <b>116</b><br><b>273</b><br><b>158</b> | <b>G/H/M</b>       |
| Ac5239        |           | (TTTG)5                     | TTGGATGTTTTTGCAAAGTT                                                                      | 57.4                                      | AAATTGCATTGTCCATTGTGA                                                                     | 58.9                                      | 242                                    | L                  |
| <b>Ac1193</b> |           | <b>(CAT)8</b>               | <b>TGCTGCAGCTGAAGAAGAAA</b><br><b>CACCCTGCTGTGTGGATATG</b><br><b>GTTTCATTGGGAAGAAGGCA</b> | <b>60.0</b><br><b>60.0</b><br><b>60.1</b> | <b>TGACATGAAGCAGGAGCACT</b><br><b>TGACATGAAGCAGGAGCACT</b><br><b>TGACATGAAGCAGGAGCACT</b> | <b>59.6</b><br><b>59.6</b><br><b>59.6</b> | <b>248</b><br><b>154</b><br><b>217</b> | <b>G/L/S</b>       |
| Ac5337        |           | (TTA)8                      | GGACTGTAGCTCGTCTGCAA<br>CAGCAGGTTGTACTGGATGG                                              | 59.2<br>59.2                              | GAGCCACGTCTGAAGCTTTT<br>GAGCCACGTCTGAAGCTTTT                                              | 59.6<br>59.6                              | 106<br>124                             | G/H/L              |
| <b>Ac5362</b> |           | <b>(TCAT)5</b>              | <b>GCGTTTAATCATCAGGACCAG</b><br><b>TCCACCAATAAAACCTCAGGA</b>                              | <b>59.6</b><br><b>59.4</b>                | <b>GCCTTGGTGTGTCAGTTGCAT</b><br><b>GGATTAACAGCCAAGCCAAA</b>                               | <b>59.8</b><br><b>60.1</b>                | <b>276</b><br><b>262</b>               | <b>G/H</b>         |
| Ac0871        |           | (AC)15                      | CCCCCTACTTCACACTCCA<br>CCCCCTACTTCACACTCCA                                                | 60.0<br>60.0                              | TGATATTATGAGGGTCGGGG<br>GAGGGTCGGGAGTAAAGAT                                               | 59.6<br>59.4                              | 137<br>128                             | B/G/L/M/S          |
| <b>Ac0863</b> |           | <b>(CGAT)6</b>              | <b>CAGCTGTT CAGCAGTGAAGC</b><br><b>GTGTCCGTCAACTCGTTCCT</b>                               | <b>59.9</b><br><b>60.2</b>                | <b>ACAGCTGCTCAAACGTCCCT</b><br><b>ACAGCTGCTCAAACGTCCCT</b>                                | <b>60.1</b><br><b>60.1</b>                | <b>150</b><br><b>214</b>               | <b>B/G/H/L/M/S</b> |
| Ac5610        |           | (TTA)9                      | GGGGAAAGGAACAGTCGTTA<br>GGGGAAAGGAACAGTCGTTA                                              | 59.0<br>59.0                              | GGTCTAACTTTGAAGTTTTGGG<br>TTTGAAGTTTTGGGTTTATTGA                                          | 60.2<br>59.8                              | 155<br>147                             | H                  |
| <b>Ac5786</b> |           | <b>(TG)13</b>               | <b>CCCAGGACGACAGAGTGT</b><br><b>AGGCAGACAGAGAGACCG</b>                                    | <b>60.2</b><br><b>59.7</b>                | <b>CCTCTGGTGTCGGACAGTTT</b><br><b>CCTCTGGTGTCGGACAGTTT</b>                                | <b>60.2</b><br><b>60.2</b>                | <b>123</b><br><b>166</b>               | <b>B/G/L/M</b>     |

| Locus         | GB acc nr | Repeat motif    | FORWARD PRIMER1 (5'-3')                                              | Tm(°C)                     | REVERSE PRIMER1 (5'-3')                                                 | Tm(°C)                     | size (bp)                | Tissue         |
|---------------|-----------|-----------------|----------------------------------------------------------------------|----------------------------|-------------------------------------------------------------------------|----------------------------|--------------------------|----------------|
| Ac1227        |           | (TCAA)5         | CTCAGCATCCTCACACAGGA<br>ATCTTCTGCAGCCTCAGCAT                         | 60.0<br>60.1               | TTGAAGGAACTGACGGGAAC<br>TTGAAGGAACTGACGGGAAC                            | 60.1<br>60.1               | 111<br>123               | B/G/H/L/M/S    |
| <b>Ac6224</b> |           | <b>(TTA)10</b>  | <b>ATTCCCCTGATTTGTGATTTT</b><br><b>TTCCCCTGATTTGTGATTTTA</b>         | <b>57.4</b><br><b>57.1</b> | <b>ACGTGCCATTCTCACATCAA</b><br><b>GTTCAGTGTCAACAACCACGG</b>             | <b>60.1</b><br><b>60.0</b> | <b>238</b><br><b>169</b> | <b>G</b>       |
| Ac6218        |           | (TAT)8          | GGTGCACCTGAGATTGACCCT<br>GGTGCACCTGAGATTGACCCT                       | 60.1<br>60.1               | GGGACAACCCACTCTCAAAA<br>GGCAATCAGTCCCACAGTCT                            | 59.9<br>60.1               | 184<br>225               | H              |
| <b>Ac6356</b> |           | <b>(ATT)8</b>   | <b>CTCGGTTGCCTAATTGATCC</b><br><b>CTCGGTTGCCTAATTGATCC</b>           | <b>59.5</b><br><b>59.5</b> | <b>TCAAAGTGGTGCTGTGAAGC</b><br><b>AATGATGACCAAAACCGGAA</b>              | <b>60.0</b><br><b>60.2</b> | <b>157</b><br><b>127</b> | <b>G/H</b>     |
| Ac6327        |           | (CTT)9          | TGCGAACTGTTGATTTCTGC                                                 | 60.0                       | ATAACTCCAGATGATGGCGG                                                    | 59.9                       | 117                      | B/H/L/M/S      |
| <b>Ac6528</b> |           | <b>(CAA)9</b>   | <b>AAAAACTGTGCCAAGCACCT</b><br><b>TGTGCCAAGCACCTACAAAA</b>           | <b>59.8</b><br><b>60.3</b> | <b>TGATCATCATTGATTTGCAGC</b><br><b>TGATCATCATTGATTTGCAGC</b>            | <b>59.6</b><br><b>59.6</b> | <b>242</b><br><b>236</b> | <b>H</b>       |
| Ac6556        |           | (TAT)8          | TCCAGCTGGGGATATAGGTG<br>TGCTACCTGTTGCTGGATTG                         | 59.9<br>59.9               | AACGCTTAATACCATGGGACA<br>AACGCTTAATACCATGGGACA                          | 59.4<br>59.4               | 186<br>264               | G/H            |
| <b>Ac1245</b> |           | <b>(CCAG)6</b>  | <b>AGACGAAAAGCAAGGCGATA</b><br><b>AGCAAGGCGATAAGGACGTA</b>           | <b>60.0</b><br><b>59.9</b> | <b>CGGCCTCACATCGTTTTATT</b><br><b>CGGCCTCACATCGTTTTATT</b>              | <b>60.0</b><br><b>60.0</b> | <b>244</b><br><b>236</b> | <b>L/S</b>     |
| <b>Ac6660</b> |           | <b>(AAACA)6</b> | <b>TACAGGAATCAAAGCCGGAC</b>                                          | <b>60.1</b>                | <b>GATAACACGGAGCACGGAAT</b>                                             | <b>60.0</b>                | <b>247</b>               | <b>L/M</b>     |
| Ac6666        |           | (CAT)8          | CTCATGCAGGGACCTCTCTC<br>AGTCTGTGCACTCCCCTCAC<br>GTACCAAAGTGCCACAACA  | 59.9<br>60.3<br>59.5       | CATTTCATCAGATTGCAGG<br>CATTTCATCAGATTGCAGG<br>CATTTCATCAGATTGCAGG       | 59.1<br>59.1<br>59.1       | 132<br>204<br>103        | B/G/H/M        |
| <b>Ac1314</b> |           | <b>(TTGA)5</b>  | <b>ATGAAAAGCTGACTTGCCGT</b>                                          | <b>59.9</b>                | <b>GTATCAGCGGGCATAACCAT</b>                                             | <b>59.8</b>                | <b>254</b>               | <b>G/S</b>     |
| Ac1391        |           | (GATT)6         | CGCCCCCTCTACATCTGATA                                                 | 60.1                       | TCAGAGAGGAAAACAAAGAAACA                                                 | 58.2                       | 227                      | H              |
| <b>Ac6912</b> |           | <b>(ATA)8</b>   | <b>TGTGATCAGGTCTCTCGTGC</b><br><b>TCGTGCTGCAGAACCTTCACT</b>          | <b>60.0</b><br><b>59.8</b> | <b>GCCTGTGAGCAGATGAATGA</b><br><b>GCCTGTGAGCAGATGAATGA</b>              | <b>60.0</b><br><b>60.0</b> | <b>200</b><br><b>186</b> | <b>G/H</b>     |
| <b>Ac6936</b> |           | <b>(CA)12</b>   | <b>CTGGTACAGCAGAACACACACA</b>                                        | <b>59.9</b>                | <b>TTCATACGTGAAGGTGACGC</b>                                             | <b>59.7</b>                | <b>192</b>               | <b>G/H/L</b>   |
| Ac1287        |           | (AAG)9          | ACTCCATAACAGTTGGTGGC                                                 | 59.9                       | AGAAGCTACCAGGCTACCCG                                                    | 60.8                       | 119                      | G/M/S          |
| <b>Ac7204</b> |           | <b>(AAT)11</b>  | <b>GGGTTGTTGAGTCAGCAGGT</b><br><b>GCCTGAAGGTGACGATGTCT</b>           | <b>60.2</b><br><b>60.3</b> | <b>TGATATTGTACGCTTTGTGTTTT</b><br><b>TGATATTGTACGCTTTGTGTTTT</b>        | <b>59.1</b><br><b>59.1</b> | <b>249</b><br><b>212</b> | <b>G/L</b>     |
| Ac1255        |           | (TAT)9          | GACACGCGAGATGTGTGTTT<br>TGGGGTATTAATAATGCTGGG                        | 59.8<br>59.7               | TCAGCAGTAAAGTAAAATACTCCC<br>TCAGCAGTAAAGTAAAATACTCCC                    | 60.2<br>60.2               | 125<br>106               | H/M/S          |
| <b>Ac7251</b> |           | <b>(AC)12</b>   | <b>TTCTTCCTGGGGTCAAACAC</b><br><b>CAGCGACTATTCTTCCGGG</b>            | <b>59.9</b><br><b>59.8</b> | <b>TTCCCTTACTGAAGATAATTGTTGC</b><br><b>TTCCCTTACTGAAGATAATTGTTGC</b>    | <b>59.9</b><br><b>59.9</b> | <b>161</b><br><b>170</b> | <b>G/L/S</b>   |
| Ac7419        |           | (TTT)5          | AGGAGGGGGAGACTCACTGT<br>AATATGCCAGGGCCACATAA<br>ATAAGAGGAATGGCCAGGGT | 60.1<br>60.2<br>59.8       | CAGTGCAGTAGCTAATGGGGA<br>CAGTGCAGTAGCTAATGGGGA<br>CAGTGCAGTAGCTAATGGGGA | 60.3<br>60.3<br>60.3       | 113<br>226<br>210        | H/M            |
| <b>Ac7911</b> |           | <b>(CA)14</b>   | <b>CGGCTGTGACATCATTCACT</b><br><b>AAGAACTGATGACAGCGGC</b>            | <b>59.7</b><br><b>60.4</b> | <b>CGCAGGACGGAGTTTATTT</b><br><b>CGCAGGACGGAGTTTATTT</b>                | <b>59.2</b><br><b>59.2</b> | <b>151</b><br><b>167</b> | <b>G/H/L/S</b> |
| Ac8081        |           | (ACAG)5         | GTTTTGGCAAAGTTTGGAGG<br>ACCCTGAAGAGTGTGTTGGC                         | 59.6<br>59.2               | CCTGGCACTCCACATCCTA<br>CCTGGCACTCCACATCCTA                              | 61.1<br>61.1               | 118<br>130               | B/G/L/S        |

Tab. S4
